1 **Title:** Non-responder phenotype reveals microbiome-wide antibiotic resistance in the murine  
2 gut.

3  
4 **Authors:** Christian Diener<sup>1#</sup>, Anna C. H. Hoge<sup>1#</sup>, Sean M. Kearney<sup>2,3</sup>, Susan E. Erdman<sup>4</sup>, and  
5 Sean M. Gibbons<sup>1,5,\*</sup>

6  
7 <sup>1</sup> Institute for Systems Biology, Seattle, WA, USA

8 <sup>2</sup> Department of Biological Engineering, Massachusetts Institute of Technology, Cambridge, MA,  
9 USA

10 <sup>3</sup> Broad Institute of MIT and Harvard, Cambridge, MA, USA

11 <sup>4</sup> Division of Comparative Medicine, Massachusetts Institute of Technology, Cambridge, MA,  
12 USA

13 <sup>5</sup> eScience Institute, University of Washington, Seattle, WA, USA

14 # Authors contributed equally

15 \* correspondence can be addressed to [sgibbons@systemsbiology.org](mailto:sgibbons@systemsbiology.org)

16  
17 **Abstract**

18 Broad spectrum antibiotics can cause both transient and lasting damage to the ecology of the  
19 gut microbiome. Loss of gut bacterial diversity has been linked to immune dysregulation and  
20 disease susceptibility. Antibiotic-resistant populations of cells are known to arise spontaneously  
21 in single-strain systems. Furthermore, prior work on subtherapeutic antibiotic treatment in  
22 humans and therapeutic treatments in non-human animals have suggested that entire gut  
23 communities may exhibit spontaneous resistance phenotypes. In this study, we validate the  
24 existence of these community resistance phenotypes in the murine gut and explore how  
25 antibiotic duration or diet influence the frequency of this phenotype. We find that almost a third  
26 of mice exhibit whole-community resistance to a therapeutic concentration of the  $\beta$ -lactam  
27 antibiotic cefoperazone, independent of antibiotic treatment duration or xenobiotic dietary  
28 amendment. These non-responder (i.e. resistant) microbiota were protected from biomass  
29 depletion, transient ecological community collapse, and lasting diversity loss seen in the  
30 susceptible microbiota. There were no major differences between non-responder microbiota and  
31 untreated control microbiota at the community structure level. However, gene expression was  
32 vastly different between non-responder microbiota and controls during antibiotic treatment, with  
33 non-responder communities showing an upregulation of antimicrobial resistance genes and a  
34 down-regulation of central metabolism. Thus, non-responder phenotypes appear to combat  
35 antibiotic assault through a combination of efflux transporter upregulation and a reduced growth  
36 rate across the entire gut community. Future work should focus on what factors are responsible  
37 for tipping entire communities from susceptible to resistant phenotypes so that we might  
38 harness this phenomenon to protect our microbiota from exposure to therapeutic antibiotic  
39 treatment regimes.

40  
41  
42  
43  
44

## 45 **Introduction**

46 Despite the clear public health utility of antibiotics, there is an undeniable cost to their  
47 widespread use in medicine and agriculture<sup>1</sup>. Antibiotic resistance in pathogens is on the rise  
48 and evidence is mounting that antibiotic treatments cause damage to our commensal  
49 microbiota<sup>2-4</sup>. The gut microbiome is an integral component of the human body, helping with  
50 nutrient absorption, pathogen resistance, and immune system education<sup>2</sup>. When the ecology of  
51 the gut is compromised by antibiotics, host health can suffer<sup>5-7</sup>.

52 Previous work in humans has shown that one round of antibiotic treatment can  
53 temporarily alter the taxonomic composition of the gut microbiome, increase the prevalence of  
54 antibiotic resistance genes, and lead to a permanent loss of species diversity<sup>8-14</sup>. The steady  
55 decline of gut bacterial diversity in developed nations over the last century, likely due in part to  
56 antibiotic use, has been implicated in the rise of chronic immune dysfunction<sup>3,13,15</sup>. Thus, finding  
57 ways to prevent or mitigate the ecological damage done by antibiotics is an important public  
58 health priority<sup>13</sup>. For example, strategies have been developed to introduce activated carbon  
59 into the lower gut during antibiotic exposure to protect colonic bacteria<sup>16</sup> or to use autologous  
60 fecal transplants to replenish gut diversity following treatment<sup>17</sup>. In addition to these therapeutic  
61 strategies, the microbiome appears to exhibit natural antibiotic-resistance under certain  
62 conditions. Sup-therapeutic doses of antibiotics in animal models have been shown to  
63 substantially reduce gut microbiome diversity and biomass in some hosts but not others,  
64 indicating that these communities vary in their capacity for resistance<sup>18-20</sup>. In single-strain  
65 systems, sub-populations of antibiotic-resistant cells arise spontaneously due to stochastic  
66 apportionment of efflux transporters between daughter cells<sup>21,22</sup> or due to the spontaneous  
67 amplification of antimicrobial resistance genes in mutant sub-populations<sup>23</sup>. Analogous  
68 symmetry-breaking processes<sup>21,22,24</sup> may contribute to observed community-level antibiotic  
69 resistance in the microbiome<sup>18,20</sup>.

70 Heterogeneous responses of gut microbiota to therapeutic antibiotic treatments have  
71 been reported in the literature<sup>10,18,25,26</sup>. For example, while antibiotic exposure is a risk factor for  
72 *Clostridium difficile* carriage and infection in hospitals, not all antibiotic-treated patients exposed  
73 to *C. difficile* become infected<sup>27,28</sup>. To investigate this phenomenon in a controlled system,  
74 Schubert et al. (2015) looked into how the type and concentration of antibiotic treatment  
75 influenced *C. difficile* colonization of the murine gut<sup>29</sup>. The authors built a Random Forest (RF)  
76 regression model that could accurately predict *C. difficile* colonization levels from the  
77 composition of the gut microbiome. Cefoperazone, a broad-spectrum  $\beta$ -lactam antibiotic, had a  
78 large effect on the composition of the gut microbiome across most mice, lowered bacterial  
79 biomass by three orders of magnitude, and made mice susceptible to *C. difficile* colonization  
80 and infection<sup>29</sup>. Interestingly, several mice that received relatively high concentrations of  
81 cefoperazone were not colonized by the pathogen<sup>29</sup>. These resistant mice were also not  
82 predicted to be colonized by the RF model and thus appeared to maintain a gut microbiome  
83 similar in composition to the control mice. Based on these results, we hypothesized that whole-  
84 community antibiotic resistance to therapeutic levels of antibiotics might be a common  
85 phenomenon in the mammalian gut.

86 In this study, we explore the potential mechanisms underlying the cefoperazone non-  
87 responder phenotype (i.e. cefoperazone resistant microbiomes) and look at how the prevalence  
88 of this phenotype varies across treatment regimes. Although it was not a focus of their work,  
89 Schubert et al. (2015) showed that the frequency of non-responder phenotypes decreased with  
90 higher concentrations cefoperazone,<sup>29</sup> which comports with prior work on sub-therapeutic  
91 antibiotic treatments in mice<sup>18,19</sup>. Other important factors that could influence the frequency of  
92 these non-responder phenotypes are the duration of antibiotic exposure<sup>30</sup> and host diet<sup>31,32</sup>. We  
93 designed and carried out two independent mouse experiments to explore the reproducibility and  
94 frequency of non-responder phenotypes to a therapeutic dose of cefoperazone (100-175  
95 mg/kg/day) across duration and dietary treatments. For the diet experiment, we included a 1%

96 seaweed amendment to normal mouse chow, as used previously by our group<sup>32</sup>. We  
97 hypothesized that previous exposures to plant-derived secondary compounds might influence  
98 subsequent responses to antibiotics<sup>33,34</sup>, and raw seaweed is a rich source of these  
99 compounds<sup>35,36</sup>. In addition to measuring community composition and biomass, we sequenced  
100 community transcriptomes in non-responder and control microbiomes to characterize the gene  
101 expression profiles underlying community-wide resistance.

102 Overall, we found that 31% (i.e. 10 out of 32) of singly-housed mice exposed to  
103 therapeutic levels of cefoperazone were protected from antibiotic-induced collapse of the gut  
104 microbiome, independent of duration or dietary treatments. The community structure, species  
105 diversity, and biomass of non-responder microbiomes were similar to untreated controls and  
106 reproducible across both experiments. Despite little-to-no change in community composition,  
107 non-responder microbiota showed dramatic differences in community transcriptional profiles  
108 when compared to untreated mice (i.e. > 25% of all gene functions were differentially  
109 expressed). Gene functions involved in growth and motility were downregulated and  
110 antimicrobial resistance (efflux transporters, in particular) was upregulated in non-responder  
111 microbiomes. Together, these results indicate that entire bacterial communities can  
112 spontaneously protect themselves from collapse in the presence of a broad-spectrum antibiotic,  
113 likely through a combination of quiescence and antimicrobial resistance.

114

## 115 **Results and Discussion**

### 116 *Antibiotic duration experiment*

117 28 week old female C57BL/6J mice from the same birth cohort were cohoused (5-6 mice per  
118 cage) prior to beginning the experiment, and then separated into individual cages 1 week prior  
119 to antibiotic treatments. Singly-housed mice were exposed to 0.5 mg/mL<sup>29</sup> cefoperazone in their  
120 drinking water for 0, 2, 4, 8, or 16 days (Fig. 1A). C57BL/6J mice drink an average of 6 mL of  
121 water each day<sup>37</sup>, so the dosage of cefoperazone was well within the therapeutic range (100-

122 150 mg/kg/day). 16S amplicon sequencing showed the majority of cefoperazone-treated mice  
123 experienced dramatic restructuring of their microbiome composition in response to antibiotics  
124 (Fig. 1B). However, 6 of the 16 cefoperazone-treated mice in this duration experiment did not  
125 exhibit a drastic change in microbiome composition over the course of the experiment. Thus,  
126 the microbiota in these mice were resistant. The only duration treatment where all mice  
127 responded to antibiotic treatment was the 4-day duration. Overall, duration of exposure had no  
128 significant influence over the frequency of non-responder phenotypes (Fisher's Exact Test  
129  $p=0.44$ ). The microbiome composition of non-responder mice was indistinguishable from  
130 untreated control mice at the phylum level (Fig. 1C), but there were detectable differences in  
131 Bacteroides, Akkermansia, and Lachnospiraceae at the amplicon sequence variant (ASV) level  
132 (see Methods and Fig. 1B). Susceptible mice showed a major turnover in community  
133 composition at the phylum level, with a near-complete loss of Bacteroides and Firmicutes and a  
134 dramatic enrichment of Proteobacteria and Cyanobacteria. Proteobacteria and Cyanobacteria  
135 reads were identified as being derived largely from mitochondria (likely from host) and  
136 chloroplasts (likely from plant-based diet), respectively. Initially, we had predicted that duration  
137 of exposure would be positively correlated with ASV extinction rates (i.e. ASVs present within a  
138 mouse initially, but not at the end of the experiment). Treatment duration had no significant  
139 effect on loss, gain (i.e. absent initially within a mouse, but present at the end of the  
140 experiment), or persistence (i.e. present within a mouse at the beginning and end of the  
141 experiment) of ASVs across the entire data set (ANOVA  $p > 0.1$ ). There was a clear significant  
142 increase in species extinctions and a decrease in persistent ASVs in antibiotic susceptible mice  
143 compared to control mice (Fig. 1D). Non-responder mice, however, showed no significant  
144 differences from controls in ASVs gained, lost, or persistent (Fig. 1D). Thus, non-responder  
145 microbiota were protected from phylum-level collapse of gut bacterial community structure  
146 following antibiotics and from antibiotic-associated diversity loss.

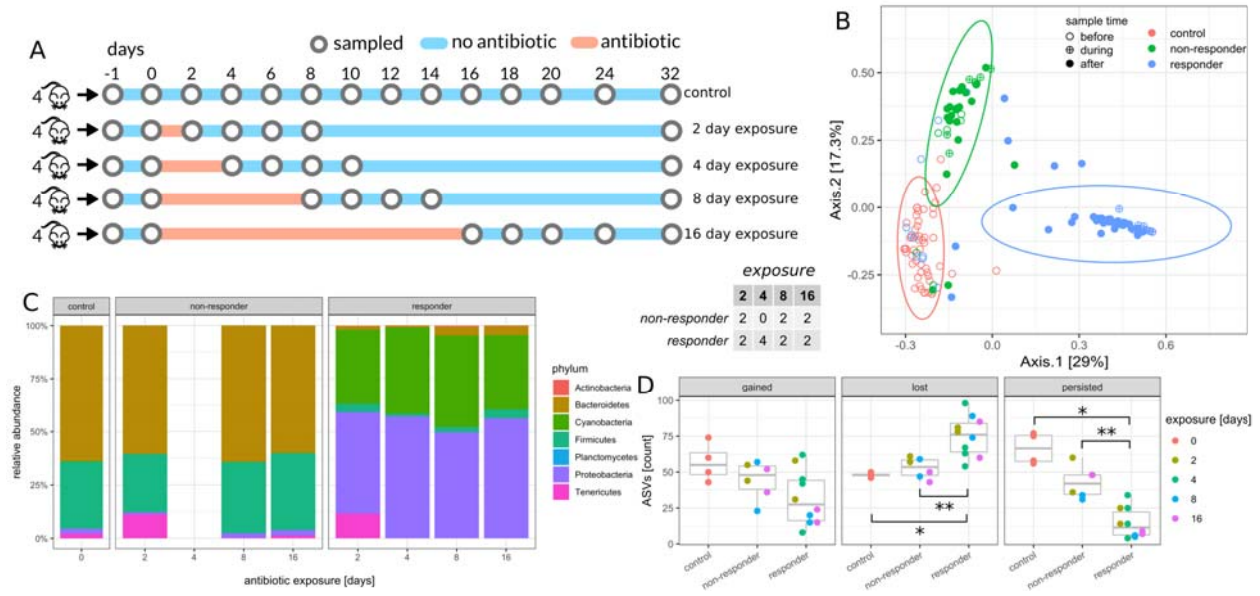

147

148

149 **Figure 1. Effect of antibiotic exposure duration on non-responder phenotype.** Table in the center  
 150 denotes number of non-responder and responder mice in each treatment duration group. (A)

151 Experimental design for the duration experiment. Circles denote sampled time points. (B) Principal  
 152 coordinate analysis (PCoA) of samples during and after antibiotic exposure (n=143, day >= 0). Ellipses

153 denote 95% confidence intervals from a Student t-distribution. Each point denotes a sample and  
 154 annotated numbers denote days after antibiotics treatment. ASV abundances were rarefied to 10K reads

155 for each sample and percentages in brackets denote the explained variance. (C) Relative abundance of  
 156 phyla at the last day of antibiotics treatment. The control panel is an average over all untreated controls.

157 Only phyla with a relative abundance of at least 0.1% are shown. (D) Dynamics of amplicon sequence  
 158 variants (ASVs). Gained ASVs are variants that were not present before antibiotics treatment but are

159 present after. Similarly, lost ASVs were present before treatment but not after, and persistent ASVs were  
 160 present before and after.

161

162

163

164

165

166

167

168

169

170

### Seaweed diet experiment

14 seven-week-old female C57BL/6J mice from the same birth cohort were cohoused prior to

beginning the experiment (5-6 mice per cage), and then separated into individual cages 1 week

prior to dietary treatments. Half of the mice were given a 1% seaweed in normal chow diet and

the other half received a normal chow diet for 20 days (Fig. 2A). All mice were put on a normal

chow diet for six days prior to antibiotic treatment. On day 26, all mice continued on a normal

chow diet and replicate mice from each dietary treatment group were given 0.5 mg/mL

cefoperazone in their drinking water for a period of 6 days (Fig. 2A). On most sampling days,

only the first three replicates from each treatment group were sampled for 16S sequencing.



171 However, on the final day of antibiotic treatment, the full set of replicate mice were sampled (16  
 172 antibiotic-treated mice and 12 control mice). Seaweed treatment had a very minor impact on the  
 173 composition and diversity of the microbiome (Fig. S1), similar to what we had observed  
 174 previously<sup>32</sup>. We found the same non-responder and responder phenotypes as in the duration  
 175 experiment, with 4 of the 16 mice exhibiting the non-responder phenotype (Fig. 2B-C). The  
 176 seaweed diet had no effect on the frequency of the non-responder phenotype (Fisher's Exact  
 177 Test  $p = 1.0$ ). We measured total 16S copy numbers for each sample (i.e. a proxy for bacterial  
 178 biomass) and found that antibiotic susceptible mice showed a dramatic drop in fecal bacterial  
 179 biomass following cefoperazone treatment, while non-responder microbiomes did not differ  
 180 significantly from controls in biomass levels (Fig. 2D). Similar to the first study, we saw an  
 181 enrichment in mitochondrial and chloroplast sequences in the susceptible mice, which also  
 182 corresponded to the drop in bacterial biomass (Fig. 2D-E). Thus, it appears that the absence of  
 183 appreciable bacterial biomass in a mouse stool results in an enrichment for host and dietary  
 184 contaminants in 16S amplicon sequencing data.  
 185

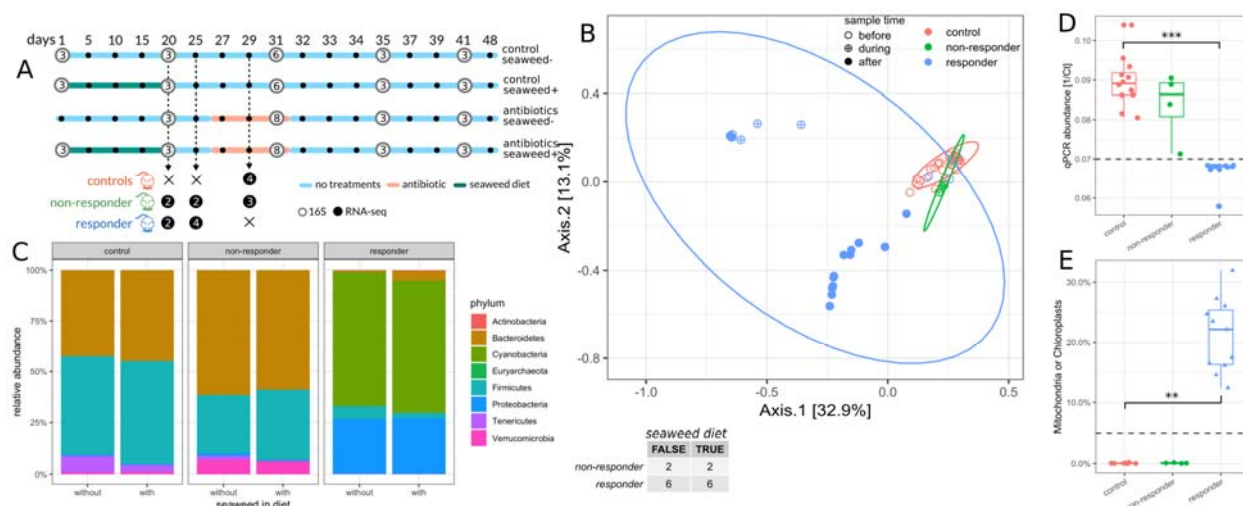

186  
 187 **Figure 2. Effect of seaweed diet on non-responder phenotype.** Table in the center denotes number of  
 188 non-responder and responder mice in each diet group. (A) Design of the diet experiment. White circles  
 189 denote 16S samples and are filled with the number of biological replicates for each sampling point. Black  
 190 circles denote RNA-seq samples. (B) PCoA of 16S samples after diet ( $n=60$ , day  $\geq 20$ ). Symbol fill  
 191 denotes sampling time relative to antibiotic treatment. Ellipses denote 95% confidence interval from a

192 Student t-distribution. ASV abundances were rarefied to 5K reads for each sample and percentages in  
193 brackets show explained variance. (C) Relative phyla abundances across diet and response groups. Only  
194 phyla with a relative abundance larger than 0.1% are shown. (D) qPCR biomass estimates (1/Ct) for  
195 samples across response groups. (E) Percentage of mitochondria and chloroplast sequences in 16S  
196 amplicon data across response groups. Triangles indicate samples below dashed line in panel D,  
197 considered to be low-biomass, while circles indicate high biomass samples  
198

### 199 *Temporal dynamics following antibiotic treatment*

200 Despite greater loss of species in susceptible mice (Fig. 1D), overall alpha diversity tended to  
201 recover over time in these mice after cessation of antibiotic treatment. Non-responder and  
202 control mice maintained relatively stable alpha diversities over time, although antibiotic-treated,  
203 non-responder microbiota showed slightly lower alpha diversities than controls (Fig. 3A).  
204 Despite the resilience of Shannon diversity in the susceptible mice over time, only a small  
205 number of these mice showed recovery in Bacteroidetes ASVs (Fig. 3B). In control and non-  
206 responder mice, Bacteroidetes was the dominant phylum over the entire time series. However,  
207 Firmicutes became the dominant phylum in responder mice following antibiotics and in many  
208 mice there appeared to be a permanent loss of the Bacteroidetes phylum following recovery  
209 (Fig. 3B). Seaweed dietary treatment appeared to contribute to a loss in resilience, with none of  
210 the seaweed-fed susceptible mice showing recovery of the Bacteroides phylum (Fig. S1).

211         Post-antibiotics, the susceptible microbiomes were dominated by Firmicutes (Figure 3B).  
212 In the diet experiment, in which mice were sampled on the last day of antibiotics and then 4  
213 days post-antibiotics, most Firmicutes ASVs belonged to the order Clostridiales. In the duration  
214 experiment, however, mice were sampled 2 days post-antibiotics. At the 2-day timepoint, some  
215 Firmicutes populations were dominated by ASVs from the order Lactobacillales, while the rest  
216 showed the familiar Clostridiales-dominated signature. By 4-days post-antibiotics, however,  
217 Clostridiales had reached greater than 82% relative abundance in all mice, and the  
218 Lactobacillales population had uniformly dwindled to less than 3.4% relative abundance. Thus,



219 Lactobacillales ASVs appear to be involved in rapid recovery following cessation of antibiotic  
220 treatment, but are quickly displaced by Clostridiales ASVs.

221 Despite the fact that we saw no major differences in the gut microbiomes between  
222 control diet (i.e. normal chow) mice and 1% seaweed-fed mice (Figs. 2C and S1), we did  
223 observe a difference in mouse weight loss (Fig. 3C). All antibiotic susceptible mice that were fed  
224 seaweed showed a large, transient weight-drop a few days following the cessation of antibiotics  
225 (Fig. 3C). Antibiotic-treated mice that did not receive seaweed also showed a mild drop in  
226 weight, but the effect was weaker (Fig. 3C). This weight loss phenotype was not observed in  
227 control mice that were not treated with cefoperazone and was also not observed in antibiotic  
228 non-responder mice from both diet treatment groups (Fig. 3C). We do not have an explanation  
229 for this synergistic effect between seaweed diet and cefoperazone treatment on transient weight  
230 loss in mice, but we believe this to be an interesting research avenue to explore further.

231

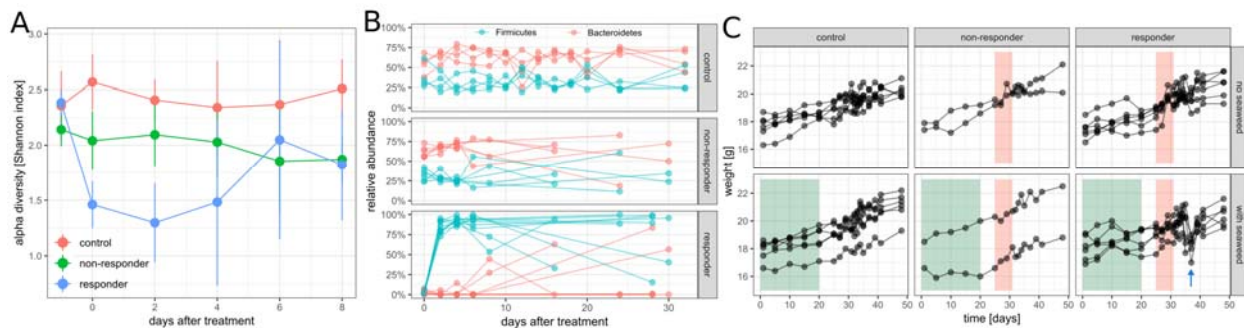

232 **Figure 3. Temporal dynamics in non-responder and responder mice following antibiotic and diet**  
233 **treatments.** (A) Alpha diversity (Shannon index) dynamics after antibiotics treatment in the duration  
234 experiment. Each point denotes mean of all samples regardless of duration and error bars denote  
235 standard deviation. (B) Dynamics of Bacteroidetes and Firmicutes phyla in the antibiotic duration  
236 experiment. (C) Mouse weights in the diet experiment. Green areas denotes seaweed diet treatment  
237 windows and red area denotes antibiotics treatment windows. The blue arrow indicates transient weight  
238 loss in seaweed-fed mice a few days following the end of antibiotic treatment.

239

240

241 *Non-responder microbiomes exhibit an antimicrobial resistance transcriptional program*

242 To evaluate whether the occurrence of the non-responder phenotype might be associated with

243 changes in gene transcription in the gut, we performed RNA sequencing on samples from 10

245 mice before antibiotic treatment (days 20 and 25) and 7 mice during antibiotic treatment (day  
246 29). Because there was close to no biomass in responder fecal samples after antibiotics  
247 treatment, we compared non-responders to untreated controls on day 29. After RNA extraction,  
248 ribosomal depletion, and sequencing to a mean of 20 million reads per sample, we identified  
249 around 800,000 unique transcripts by *de novo* assembly (see Material and Methods) ranging  
250 from 111 to >26,000 bp lengths (longer contigs were polycistronic; see Fig. S2 for length and  
251 coverage distributions). Non-summarized transcript abundances were sufficient to distinguish  
252 non-responder communities from controls after antibiotic treatment (Fig. 4A). However, that may  
253 be due to the high specificity of transcripts for each sample since we found that, on average,  
254 each transcript only appeared in 3 of the 17 total samples (Fig. S3A). Thus, we also also  
255 assigned functional annotations to transcripts by aligning them to the M5NR database<sup>38</sup>. We  
256 were able to assign 61% of the original transcripts to functions in the SEED subsystem  
257 database<sup>39</sup>. This allowed us to collapse transcript counts for each sample into SEED functions,  
258 which yielded a total of 53,877 unique functions. The majority of SEED functions were detected  
259 in all 17 RNA-seq samples (see Fig. S3B). Control and non-responder communities could be  
260 easily distinguished by functional counts (see Fig. 4B). In particular, about 45% of the variance  
261 in functional expression could be explained by non-responder vs. control status (Euclidean  
262 PERMANOVA  $p = 0.036$ ) compared to only 6.7% of explained variance in 16S beta diversity  
263 (Bray-Curtis PERMANOVA  $p = 0.027$ ). Thus, transcriptional differences capture the non-  
264 responder phenotype much better than changes in community composition.

265

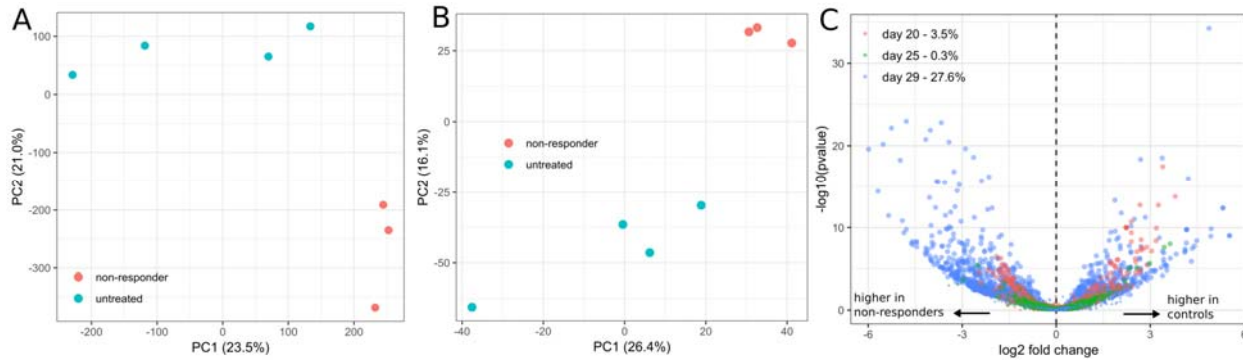

266  
267 **Figure 4. Global transcriptional response to antibiotics in non-responder phenotypes.** (A) Principal  
268 component analysis (PCA) of post-treatment samples based on abundances of *de novo* assembled  
269 transcripts. Percentages in brackets denotes explained variance. (B) PCA of post-treatment samples  
270 based on abundances of functional groups. (C) Volcano plot of untreated vs. non-responder differential  
271 abundance tests (functional groups). Percentages for each day denote positive tests rate (number of  
272 significant tests / total tests) and colors denote day the samples were taken (20 and 25 were before  
273 antibiotic treatment and day 29 was after). Tests with FDR q-values < 0.05 are shown as larger dots,  
274 whereas non-significant results are shown as small dots.  
275

276 After filtering out low abundance functions, differential expression testing between  
277 controls and non-responder communities was performed for each of the three time points  
278 sampled (see Materials and Methods). We observed that less than 5% of the observed  
279 functions were differentially expressed at an FDR  $q \leq 0.05$  before antibiotic exposure (days 20  
280 and 25), which fits our null-expectation. However, following antibiotic exposure (day 29), 27% of  
281 all functions were differentially expressed between untreated controls and non-responder  
282 communities (see Fig. 4C). This indicated a global transcriptional shift in non-responder  
283 microbiomes, mostly characterized by a up-regulation of several functional groups in the non-  
284 responder mice (blue dots on left side of Fig. 4C).

285 The transcriptional program was most prominently characterized by an upregulation of  
286 efflux transporters and other antibiotic resistance defense mechanisms, and a down-regulation  
287 of motility and respiratory functions. For instance, the SEED sub-pathway “Transporters in  
288 Models” was the most prominent subpathway in the differentially expressed functions,  
289 containing 82 significant hits (FDR  $q \leq 0.05$ ). Most of the significantly upregulated functions in  
290 the “Virulence, Disease and Defense” superpathway were also related to efflux pumps and their

291 regulation (Fig. 5A). We also found large differences in of respiratory pathways, albeit with a  
292 mixed pattern of up- and down-regulation (Fig. 5B). The most striking respiratory difference we  
293 observed was the down-regulation of three acetyl-CoA synthases which were some of the most  
294 highly expressed functions in the untreated mice (Fig. 5E). These pathways were down-  
295 regulated by one to two orders of magnitude in the non-responder mice, which suggests a  
296 down-regulation of central metabolism. Additionally, we observed a consistent down-regulation  
297 of flagellar motor proteins in the non-responder mice (Fig. 5C). All differentially expressed  
298 functions in the “Membrane Transport” superpathway were strongly upregulated in the non-  
299 responder mice, including components of TonB, which is known to be necessary for efflux  
300 transporter function<sup>40</sup> (Fig. 5D). Together, these data are consistent with previous reports that  
301 upregulation of efflux transporters is accompanied by a concomitant reduction in growth  
302 rate<sup>21,41</sup>. Finally, we observed the upregulation of the entire vancomycin resistance locus,  
303 including the three efflux pumps Vex1-3 and the two-component system VncR and VncS (Fig.  
304 5E). The induction of vancomycin cross-resistance by  $\beta$ -lactams has been described before<sup>42,43</sup>  
305 and might indicate that these loci confer general efflux-based resistance to a range of  
306 antibiotics.

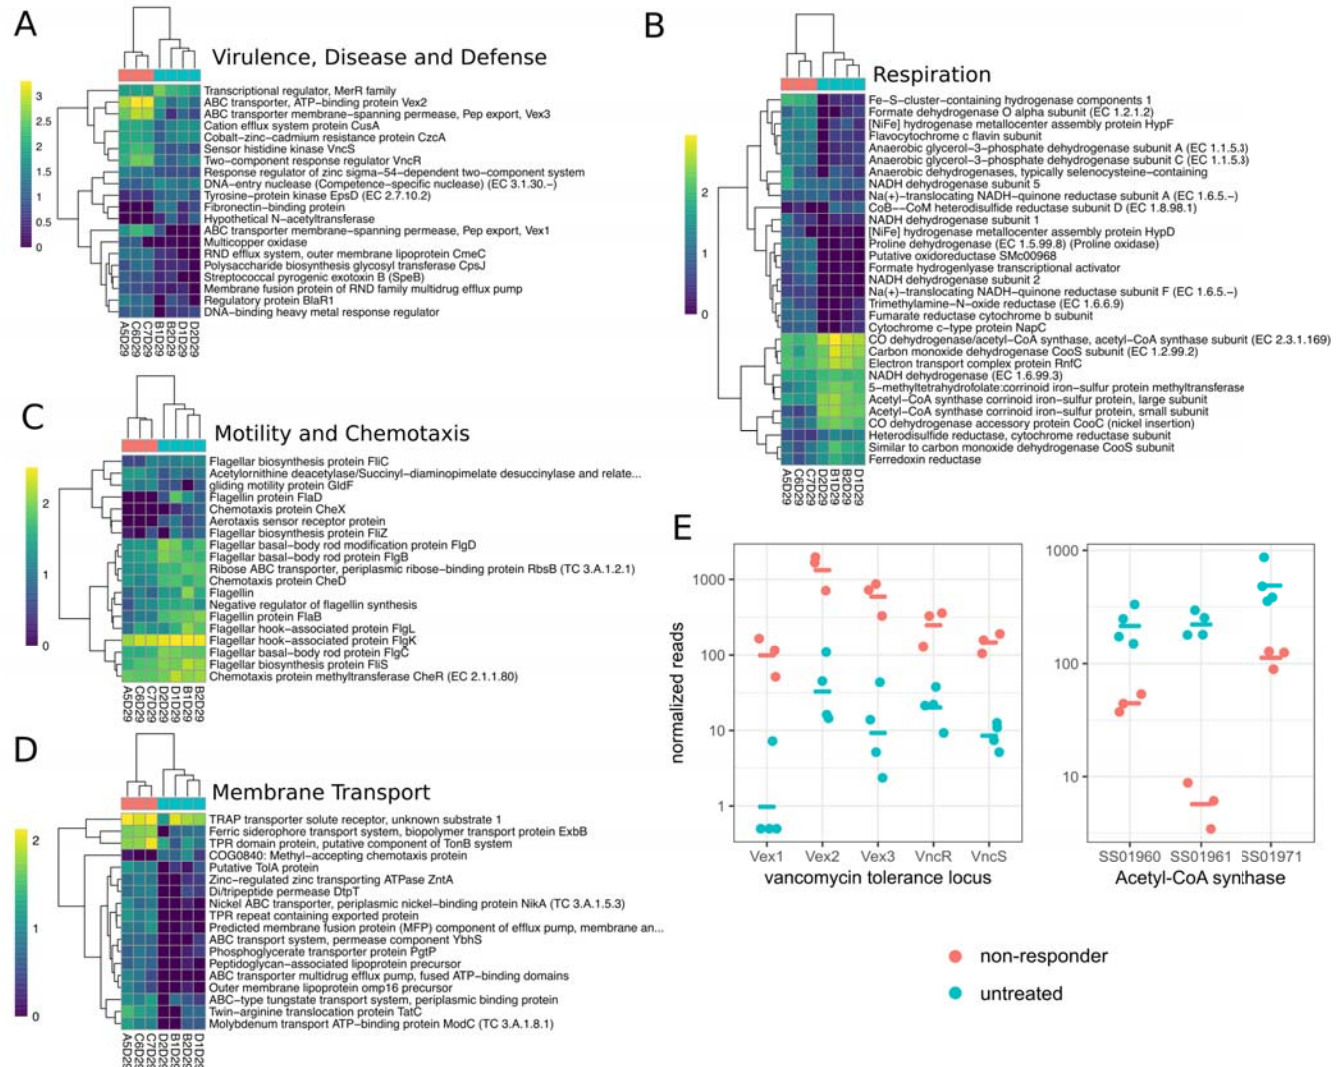

307

308 **Figure 5. Differentially abundant pathways in non-responder phenotypes.** (A-D) Heatmaps  
 309 showing differentially abundant (FDR < 0.05) functional groups grouped by SEED  
 310 superpathway. Heatmap color scale shows normalized reads on a log10 scale with a pseudo  
 311 count of 1. (E) Normalized expression of genes on the vancomycin tolerance locus and three  
 312 Acetyl-CoA synthase genes between non-responders and controls.

313

### 314 Conclusion

315

316 We found that nearly one third of mice exposed to therapeutic levels of the  $\beta$ -lactam antibiotic  
 317 cefoperazone were protected from gut microbiome community turnover, biomass collapse, and  
 318 diversity loss. The frequency of this non-responder phenotype does not depend on duration of  
 319 antibiotic exposure or on seaweed being added to the diet, but does appear to increase as the

320 concentration of cefoperazone in drinking water declines, as shown previously<sup>29</sup>. Despite very  
321 minor changes in community composition and diversity between untreated and non-responder  
322 mice, we observe a striking difference in microbiome gene expression between these groups of  
323 mice. Non-responder microbiomes show down-regulation of central metabolism and motility and  
324 upregulation of antimicrobial resistance. This combination of increased resistance and  
325 quiescence appears to protect gut communities from the extensive ecological damage observed  
326 in antibiotic-susceptible microbiomes. While prior work has shown how isogenic sub-populations  
327 of cells and two-species communities can exhibit heterogeneous responses to antibiotics<sup>20-23</sup>,  
328 the exact mechanisms underlying transitions into whole-community resistance phenotypes in  
329 the mammalian gut are not yet clear and will require further study. Future work should focus on  
330 what factors tip microbiomes between non-responder and responder phenotypes, potential  
331 hysteresis of these phenotypes, and whether or not this transition point can be manipulated to  
332 protect commensal microbiota from antibiotic assault.

333  
334  
335



## 336 **Materials and Methods**

### 337 *Animal care*

338 5- to 6-week-old female C57BL/6J mice ordered from Jackson Laboratories (Bar Harbor, ME)  
339 were housed were housed and handled in Association for Assessment and Accreditation of  
340 Laboratory Animal Care (AAALAC)-accredited facilities using techniques and diets specifically  
341 approved by Massachusetts Institute of Technology's Committee on Animal Care (CAC) (MIT  
342 CAC protocol no. 0912-090-15 and 0909-090-18). The MIT CAC (Institutional Animal Care and  
343 Use Committee [IACUC]) specifically approved the studies as well as the single-housing and  
344 handling of these animals. Mice were euthanized using carbon dioxide at the end of the  
345 experiment.

### 346 *Antibiotic duration experiment*

347 For this 34-day experiment, 20 mice were assigned randomly and evenly to 5 treatment groups:  
348 control, 2 days of antibiotic exposure, 4 days of antibiotic exposure, 8 days of antibiotic  
349 exposure, and 16 days of antibiotic exposure. The  $\beta$ -lactam antibiotic cefoperazone was  
350 administered through drinking water at a concentration of 0.5 mg/mL, as in prior work<sup>29</sup>. Fecal  
351 samples were collected on the 2 days preceding antibiotic exposure, the last day of antibiotic  
352 exposure, and select timepoints following antibiotic exposure. Mice were weighed each  
353 sampling day. Fresh fecal samples were obtained within an hour of one another each day from  
354 all animals. Fecal samples were collected into 2 mL freezer tubes with 100  $\mu$ L of anaerobic 40%  
355 glycerol containing 0.1% cysteine and transferred immediately to dry ice before being stored at -  
356 80° C prior to nucleic acid extraction.

### 357 *Seaweed diet and antibiotic experiment*

358 A new cohort of 28 mice were split randomly into two diet treatment groups and were fed with  
359 either a custom chow diet (Bio-Serv, Flemington NJ) containing 1% raw seaweed nori (Izumi  
360 Brand) or a standard control diet (product no. F3156; AN-93G; Bio-Serv, Flemington NJ). Prior  
361 to the experiment, animals were co-housed for 10 days and then singly housed for 7 days prior

362 to separation into the seaweed treatment and control groups. After 20 days of dietary treatment,  
363 all mice resumed the standard diet. From day 26 to day 31, 8 mice from each diet group were  
364 administered 0.5 mg/mL cefoperazone in their drinking water as in the duration experiment.  
365 Mice were weighed daily. Fresh fecal samples were obtained within an hour of one another  
366 each day from all animals in all groups. Fecal samples were collected into anaerobic 40%  
367 glycerol containing 0.1% cysteine and transferred immediately to dry ice before being stored at -  
368 80° C prior to nucleic acid extraction.

369

### 370 ***16S amplicon sequencing***

#### 371 *DNA extractions*

372 DNA from fecal samples and bacterial cultures was extracted using the MoBio High Throughput  
373 (HTP) PowerSoil Isolation Kit (MoBio Laboratories; now QIAGEN) with minor modifications.  
374 Briefly, samples were homogenized with bead beating and then 50 µL Proteinase K (QIAGEN)  
375 added, and samples were incubated in a 65°C water bath for 10 min. Samples were then  
376 incubated at 95°C for 10 min to deactivate the protease.

#### 377 *Amplicon sequencing library preparation and biomass quantification*

378 Libraries for paired-end Illumina sequencing were constructed using a two-step 16S rRNA PCR  
379 amplicon approach as described previously with minor modifications<sup>44</sup>. The first-step primers  
380 (PE16S\_V4\_U515\_F, 5'-ACACG ACGCT CTTCC GATCT YRYRG TGCCA GCMGC CGCGG  
381 TAA-3'; PE16S\_V4\_E786\_R, 5'-CGGCA TTCCT GCTGA ACCGC TCTTC CGATC TGGAC  
382 TACHV GGGTW TCTAA T-3') contain primers U515F and E786R targeting the V4 region of the  
383 16S rRNA gene, as described previously<sup>44</sup>. Additionally, a complexity region in the forward  
384 primer (5'-YRYR-3') was added to help the image-processing software used to detect distinct  
385 clusters during Illumina next-generation sequencing. A second-step priming site is also present  
386 in both the forward (5'-ACACG ACGCT CTTCC GATCT-3') and reverse (5'-CGGCA TTCCT  
387 GCTGA ACCGC TCTTC CGATC T-3') first-step primers. The second-step primers incorporate

388 the Illumina adaptor sequences and a 9-bp barcode for library recognition (PE-III-PCR-F, 5'-  
389 AATGA TACGG CGACC ACCGA GATCT ACACT CTTTC CCTAC ACGAC GCTCT TCCGA  
390 TCT-3'; PE-III-PCR-001-096, 5'-CAAGC AGAAG ACGGC ATACG AGATN NNNNN NNNCG  
391 GTCTC GGCAT TCCTG CTGAA CCGCT CTTCC GATCT-3', where N indicates the presence  
392 of a unique barcode).

393 Real-time qPCR before the first-step PCR was done to ensure uniform amplification,  
394 avoid overcycling templates, and to provide a basic estimate of bacterial biomass for each  
395 sample (i.e. total copies of the 16S gene per volume of DNA extraction from a single mouse  
396 fecal pellet). Both real-time and first-step PCRs were done similarly to the manufacturer's  
397 protocol for Phusion polymerase (New England BioLabs, Ipswich, MA). For qPCR, reactions  
398 were assembled into 20  $\mu$ L reaction volumes containing the following: DNA-free H<sub>2</sub>O, 8.9  $\mu$ L;  
399 high fidelity (HF) buffer, 4  $\mu$ L; dinucleotide triphosphates (dNTPs), 0.4  $\mu$ L; PE16S\_V4\_U515\_F  
400 (3  $\mu$ M), 2  $\mu$ L; PE16S\_V4\_E786\_R (3  $\mu$ M), 2  $\mu$ L; BSA (20 mg/mL), 0.5  $\mu$ L; EvaGreen (20x), 1  
401  $\mu$ L; Phusion, 0.2  $\mu$ L; and template DNA, 1  $\mu$ L. Reactions were cycled for 40 cycles with the  
402 following conditions: 98°C for 2 min (initial denaturation); 40 cycles of 98°C for 30 s  
403 (denaturation); 52°C for 30 s (annealing); and 72°C for 30 s (extension). Samples were diluted  
404 based on qPCR amplification to the level of the most dilute sample and amplified to the  
405 maximum number of cycles needed for PCR amplification of the most dilute sample (18 cycles,  
406 maximally, with no more than 8 cycles of second-step PCR). For first-step PCR, reactions were  
407 scaled (EvaGreen dye excluded; water increased) and divided into three 25- $\mu$ L replicate  
408 reactions during both first- and second-step cycling reactions and cleaned after the first and  
409 second step using Agencourt AMPure XP-PCR purification (Beckman Coulter, Brea, CA)  
410 according to manufacturer instructions. Second-step PCR contained the following: DNA-free  
411 H<sub>2</sub>O, 10.65  $\mu$ L; HF buffer, 5  $\mu$ L; dNTPs, 0.5  $\mu$ L; PE-III-PCR-F (3  $\mu$ M), 3.3  $\mu$ L; PE-III-PCR-XXX (3  
412  $\mu$ M), 3.3  $\mu$ L; Phusion, 0.25  $\mu$ L; and first-step PCR DNA, 2  $\mu$ L. Reactions were cycled for 10  
413 cycles with the following conditions: 98°C for 30 s (initial denaturation); 10 cycles of 98°C for 30

414 s (denaturation); 83°C for 30 s (annealing); and 72°C for 30 s (extension). Following second-  
415 step clean-up, product quality was verified by DNA gel electrophoresis and sample DNA  
416 concentrations determined using Quant-iT PicoGreen dsDNA Assay Kit (Thermo Fisher  
417 Scientific). The libraries were multiplexed together and sequenced using the paired-end with  
418 250-bp paired-end reads approach on the MiSeq Illumina sequencing machine at the BioMicro  
419 Center (Massachusetts Institute of Technology, Cambridge, MA).

#### 420 *16S amplicon sequencing data analysis*

421 Amplicon sequencing data was processed using DADA2<sup>45</sup> and a custom 16S analysis pipeline  
422 available at <https://github.com/gibbons-lab/mbtools>. After performing general quality  
423 assessment, raw reads were filtered using the “filterAndTrim” method from DADA2 using a left  
424 trim of 10bp to avoid low complexity 5’ sequences and a maximum of 2 expected errors per  
425 read under Illumina model. Length truncation was performed based on the quality profiles and  
426 ensuring that sufficient overlap for merging remained. Reads in the duration experiment were  
427 truncated at 240 and 150 bps for forward and reverse reads respectively, and reads in the diet  
428 experiment were truncated at 240 and 170 bps. More than 88% of the reads in the duration  
429 experiment and 93% of the reads in the diet experiment passed quality filtering and were  
430 passed on to downstream processing with DADA2. Error rates were learned on a sample of 250  
431 million bases and most of the inferred sequence variants could be merged across forward and  
432 reverse reads (>95% of preprocessed reads remaining). Less than 7% of all reads from both  
433 experiments were classified as chimeric and removed as well. Taxonomy was assigned to the  
434 sequence variants using the DADA2 Naive Bayes classifier with a bootstrap agreement of >50%  
435 and using the SILVA ribosomal database<sup>46</sup> version 132. Species were assigned by exact  
436 alignment where possible. PERMANOVA was performed using the Bray-Curtis distance on  
437 rarefied read counts with the “adonis” function from the “vegan” package ([https://CRAN.R-](https://CRAN.R-project.org/package=vegan)  
438 [project.org/package=vegan](https://CRAN.R-project.org/package=vegan)). Amplicon sequence variants contributing to the separation of

439 variances were identified from the coefficients of individuals regressions against the target  
440 variable (returned by the “adonis” function as well).

441 All workflows (as R notebooks), installation instructions and additional metadata are  
442 provided at [https://github.com/gibbons-lab/mouse\\_antibiotics](https://github.com/gibbons-lab/mouse_antibiotics) and allow reproduction of all  
443 results and figures from the manuscript starting from the raw data. More complex functionality is  
444 provided in a dedicated R package (“mbtools”) which is provided along with documentation at  
445 <https://github.com/gibbons-lab/mbtools>. Raw sequencing data can be found on the Sequence  
446 Read Archive (SRA) (<https://www.ncbi.nlm.nih.gov/sra>) under accession numbers  
447 SRRXXXXXX, SRRXXXXX, and SRXXXXXX (Bioproject ID BXXXXXXX) [RAW DATA WILL  
448 BE MADE PUBLIC PRIOR TO PUBLICATION].

449

#### 450 ***RNA extraction, RNA sequencing, and RNAseq data analysis***

##### 451 *RNA extraction*

452 RNA was extracted from a total of 17 samples from Experiment 2 with the AllPrep PowerFecal  
453 DNA/RNA Kit (Qiagen USA, Cat. No. 80244). The 17 samples included 7 target samples taken  
454 during antibiotic treatment (4 untreated and 3 non-responder) and 10 negative controls prior to  
455 antibiotic treatment (day 20 and 25, 6 susceptible and 4 non-responder). RNA integrity numbers  
456 (RIN) were obtained using a 2100 BioAnalyzer (Agilent USA) with the Eukaryote Total RNA  
457 Nano Series II chip (Agilent USA). The majority of samples showed RINs above 5 and samples  
458 with lower RIN (5 of the control samples) were included in sequencing while controlling for the  
459 effect of low integrity in downstream analyses by explicitly including RIN as a confounder, as  
460 described previously<sup>47</sup>.

##### 461 *Library preparation and RNA sequencing*

462 Ribosomal RNA was depleted from the 17 RNA-seq samples using the Ribo-Zero Gold rRNA  
463 Removal Kit (Illumina USA, Cat. No. MRZE724) and final concentrations were measured using  
464 the Qubit RNA HS Assay Kit (ThermoFisher Scientific USA, Cat. No. Q32852). Library

465 preparation was performed using the TruSeq Stranded mRNA LT Sample Prep Kit (Illumina  
466 USA, Cat. No. RS-122-2101) and all samples were sequenced in single end mode in one run on  
467 an Illumina NextSeq (NS500720) for 85 cycles, which yielded a total of 464 million reads.

#### 468 *Data analysis*

469 Raw sequencing reads were quality filtered using the “filterAndTrim” function from DADA2 with  
470 a left trim of 5bp and a maximum expected error (maxEE) of 1. More than 95% of the raw reads  
471 passed those filters and were used for all downstream analyses. No length truncation was  
472 performed due to the short length and high 3' quality scores of the reads.

473 Transcripts were assembled *de novo* from the filtered reads with RNA Spades (version  
474 3.12.0) across the full set of reads (<http://cab.spbu.ru/software/rnaspades/>)<sup>48</sup> using the default  
475 parameters. Transcript abundances for each sample were quantified by aligning the filtered  
476 reads to the assembled transcripts with Bowtie2 version 2.3.4.3<sup>49</sup>. Mapping of unique reads to  
477 several transcripts was resolved by allowing up to 60 alternative alignments per read and  
478 counting the transcript abundances with an transcript length-aware Expectation-Maximization  
479 algorithm as used by Kallisto<sup>50</sup>.

480 Functional annotations for the *de novo* assembled transcripts were obtained by first  
481 aligning the transcripts to the M5NR database<sup>38</sup> using DIAMOND version 0.9.21<sup>51</sup>. Functional  
482 annotations were then obtained by using the existing mapping between M5NR and the SEED  
483 subsystems database<sup>39</sup> as downloaded from the MG-RAST FTP  
484 (<ftp://ftp.metagenomics.anl.gov/data/misc/JGI/>). Finally, abundances for functional groups were  
485 calculated by summing the reads for each unique SEED subsystem ID in each sample.

486 Normalization, differential abundance testing and false discovery rate (FDR) adjustment  
487 for assembled transcripts or functional groups were performed using DESeq2 version 1.18.1<sup>52</sup>.  
488 To avoid a bimodal p-value histogram, this was preceded by a prefiltering step removing  
489 features with an average abundances <10 reads or not appearing in at least two of the samples.

490



491 **Acknowledgements**

492 CD, ACHH, and SMG were supported by the Washington Research Foundation Distinguished  
493 Investigator Award and by startup funds from the Institute for Systems Biology. SK and SMG  
494 were supported by the Center for Microbial Informatics and Therapeutics at MIT. Thanks to Eric  
495 Alm, Sui Huang, Nathan Price, Nitin Baliga, Naeha Subramanian, and members of the Gibbons  
496 Lab for helpful feedback on this work.

497

498

499 **References**

- 500 1. Ventola, C. L. The antibiotic resistance crisis: part 1: causes and threats. *P T* **40**, 277–283  
501 (2015).
- 502 2. Baquero, F. & Nombela, C. The microbiome as a human organ. *Clin. Microbiol. Infect.* **18**,  
503 2–4 (2012).
- 504 3. Blaser, M. J. *Missing Microbes: How the Overuse of Antibiotics Is Fueling Our Modern*  
505 *Plagues*. (Henry Holt and Company, 2014).
- 506 4. Bach, J.-F. The hygiene hypothesis in autoimmunity: the role of pathogens and  
507 commensals. *Nat. Rev. Immunol.* **18**, 105–120 (2018).
- 508 5. Bartlett, J. G. Clinical practice. Antibiotic-associated diarrhea. *N. Engl. J. Med.* **346**, 334–  
509 339 (2002).
- 510 6. Buffie, C. G. *et al.* Profound alterations of intestinal microbiota following a single dose of  
511 clindamycin results in sustained susceptibility to *Clostridium difficile*-induced colitis. *Infect.*  
512 *Immun.* **80**, 62–73 (2012).
- 513 7. Buffie, C. G. *et al.* Precision microbiome reconstitution restores bile acid mediated  
514 resistance to *Clostridium difficile*. *Nature* **517**, 205–208 (2015).
- 515 8. Jakobsson, H. E. *et al.* Short-term antibiotic treatment has differing long-term impacts on  
516 the human throat and gut microbiome. *PLoS One* **5**, e9836 (2010).

- 517 9. Jernberg, C., Löfmark, S., Edlund, C. & Jansson, J. K. Long-term ecological impacts of  
518 antibiotic administration on the human intestinal microbiota. *ISME J.* **1**, 56–66 (2007).
- 519 10. Dethlefsen, L. & Relman, D. A. Incomplete recovery and individualized responses of the  
520 human distal gut microbiota to repeated antibiotic perturbation. *Proc. Natl. Acad. Sci. U. S.*  
521 *A.* **108 Suppl 1**, 4554–4561 (2011).
- 522 11. Zaura, E. *et al.* Same Exposure but Two Radically Different Responses to Antibiotics:  
523 Resilience of the Salivary Microbiome versus Long-Term Microbial Shifts in Feces. *MBio* **6**,  
524 e01693–15 (2015).
- 525 12. Rashid, M.-U. *et al.* Determining the Long-term Effect of Antibiotic Administration on the  
526 Human Normal Intestinal Microbiota Using Culture and Pyrosequencing Methods. *Clin.*  
527 *Infect. Dis.* **60 Suppl 2**, S77–84 (2015).
- 528 13. Blaser, M. J. Antibiotic use and its consequences for the normal microbiome. *Science* **352**,  
529 544–545 (2016).
- 530 14. Palleja, A. *et al.* Recovery of gut microbiota of healthy adults following antibiotic exposure.  
531 *Nat Microbiol* **3**, 1255–1265 (2018).
- 532 15. Vatanen, T. *et al.* Variation in Microbiome LPS Immunogenicity Contributes to  
533 Autoimmunity in Humans. *Cell* **165**, 1551 (2016).
- 534 16. de Gunzburg, J. *et al.* Protection of the Human Gut Microbiome From Antibiotics. *J. Infect.*  
535 *Dis.* **217**, 628–636 (2018).
- 536 17. Taur, Y. *et al.* Reconstitution of the gut microbiota of antibiotic-treated patients by  
537 autologous fecal microbiota transplant. *Sci. Transl. Med.* **10**, (2018).
- 538 18. Livanos, A. E. *et al.* Antibiotic-mediated gut microbiome perturbation accelerates  
539 development of type 1 diabetes in mice. *Nat Microbiol* **1**, 16140 (2016).
- 540 19. Cho, I. *et al.* Antibiotics in early life alter the murine colonic microbiome and adiposity.  
541 *Nature* **488**, 621–626 (2012).
- 542 20. Schlomann, B. H., Wiles, T. J., Wall, E. S., Guillemin, K. & Parthasarathy, R. Low-dose

- 543 antibiotics can collapse gut bacterial populations via a gelation transition. *BioRxiv* (2019).  
544 doi:10.1101/565556
- 545 21. El Meouche, I. & Dunlop, M. J. Heterogeneity in efflux pump expression predisposes  
546 antibiotic-resistant cells to mutation. *Science* **362**, 686–690 (2018).
- 547 22. Bergmiller, T. *et al.* Biased partitioning of the multidrug efflux pump AcrAB-TolC underlies  
548 long-lived phenotypic heterogeneity. *Science* **356**, 311–315 (2017).
- 549 23. Nicoloff, H., Hjort, K., Levin, B. R. & Andersson, D. I. The high prevalence of antibiotic  
550 heteroresistance in pathogenic bacteria is mainly caused by gene amplification. *Nat*  
551 *Microbiol* (2019). doi:10.1038/s41564-018-0342-0
- 552 24. El Meouche, I., Siu, Y. & Dunlop, M. J. Stochastic expression of a multiple antibiotic  
553 resistance activator confers transient resistance in single cells. *Sci. Rep.* **6**, 19538 (2016).
- 554 25. Relman, D. A. The human microbiome: ecosystem resilience and health. *Nutr. Rev.* **70**,  
555 S2–S9 (2012).
- 556 26. Francino, M. P. Antibiotics and the Human Gut Microbiome: Dysbioses and Accumulation  
557 of Resistances. *Front. Microbiol.* **6**, 1543 (2015).
- 558 27. Bignardi, G. E. Risk factors for *Clostridium difficile* infection. *J. Hosp. Infect.* **40**, 1–15  
559 (1998).
- 560 28. Bloomfield, M. G., Sherwin, J. C. & Gkrania-Klotsas, E. Risk factors for mortality in  
561 *Clostridium difficile* infection in the general hospital population: a systematic review. *J.*  
562 *Hosp. Infect.* **82**, 1–12 (2012).
- 563 29. Schubert, A. M., Sinani, H. & Schloss, P. D. Antibiotic-Induced Alterations of the Murine Gut  
564 Microbiota and Subsequent Effects on Colonization Resistance against *Clostridium difficile*.  
565 *MBio* **6**, e00974 (2015).
- 566 30. Dardas, M. *et al.* The impact of postnatal antibiotics on the preterm intestinal microbiome.  
567 *Pediatr. Res.* **76**, 150–158 (2014).
- 568 31. Devirgiliis, C., Barile, S. & Perozzi, G. Antibiotic resistance determinants in the interplay

- 569 between food and gut microbiota. *Genes Nutr.* **6**, 275–284 (2011).
- 570 32. Kearney, S. M., Gibbons, S. M., Erdman, S. E. & Alm, E. J. Orthogonal Dietary Niche  
571 Enables Reversible Engraftment of a Gut Bacterial Commensal. *Cell Rep.* **24**, 1842–1851  
572 (2018).
- 573 33. Carmody, R. N. *et al.* Diet dominates host genotype in shaping the murine gut microbiota.  
574 *Cell Host Microbe* **17**, 72–84 (2015).
- 575 34. Spanogiannopoulos, P., Bess, E. N., Carmody, R. N. & Turnbaugh, P. J. The microbial  
576 pharmacists within us: a metagenomic view of xenobiotic metabolism. *Nat. Rev. Microbiol.*  
577 **14**, 273–287 (2016).
- 578 35. Kajiwara, T., Matsui, K., Akakabe, Y., Murakawa, T. & Arai, C. Antimicrobial Browning-  
579 Inhibitory Effect of Flavor Compounds in Seaweeds. *J. Appl. Phycol.* **18**, 413–422 (2006).
- 580 36. Reichelt, J. L. & Borowitzka, M. A. Antimicrobial activity from marine algae: Results of a  
581 large-scale screening programme. in *Eleventh International Seaweed Symposium* 158–168  
582 (1984).
- 583 37. Bachmanov, A. A., Reed, D. R., Beauchamp, G. K. & Tordoff, M. G. Food intake, water  
584 intake, and drinking spout side preference of 28 mouse strains. *Behav. Genet.* **32**, 435–443  
585 (2002).
- 586 38. Wilke, A. *et al.* The M5nr: a novel non-redundant database containing protein sequences  
587 and annotations from multiple sources and associated tools. *BMC Bioinformatics* **13**, 141  
588 (2012).
- 589 39. Overbeek, R. *et al.* The SEED and the Rapid Annotation of microbial genomes using  
590 Subsystems Technology (RAST). *Nucleic Acids Res.* **42**, D206–D214 (2014).
- 591 40. Zhao, Q. *et al.* Influence of the TonB energy-coupling protein on efflux-mediated multidrug  
592 resistance in *Pseudomonas aeruginosa*. *Antimicrob. Agents Chemother.* **42**, 2225–2231  
593 (1998).
- 594 41. Li, S. J. & Cronan, J. E., Jr. Growth rate regulation of *Escherichia coli* acetyl coenzyme A

- 595 carboxylase, which catalyzes the first committed step of lipid biosynthesis. *J. Bacteriol.* **175**,  
596 332–340 (1993).
- 597 42. Hanaki, H. *et al.* Method of detecting beta-lactam antibiotic induced vancomycin resistant  
598 MRSA (BIVR). *Int. J. Antimicrob. Agents* **23**, 1–5 (2004).
- 599 43. Haas, W., Sublett, J., Kaushal, D. & Tuomanen, E. I. Revising the role of the pneumococcal  
600 *vex-vncRS* locus in vancomycin tolerance. *J. Bacteriol.* **186**, 8463–8471 (2004).
- 601 44. Preheim, S. P., Perrotta, A. R., Martin-Platero, A. M., Gupta, A. & Alm, E. J. Distribution-  
602 based clustering: using ecology to refine the operational taxonomic unit. *Appl. Environ.*  
603 *Microbiol.* **79**, 6593–6603 (2013).
- 604 45. Callahan, B. J. *et al.* DADA2: High-resolution sample inference from Illumina amplicon data.  
605 *Nat. Methods* **13**, 581–583 (2016).
- 606 46. Quast, C. *et al.* The SILVA ribosomal RNA gene database project: improved data  
607 processing and web-based tools. *Nucleic Acids Res.* **41**, D590–D596 (2012).
- 608 47. Gallego Romero, I., Pai, A. A., Tung, J. & Gilad, Y. RNA-seq: impact of RNA degradation  
609 on transcript quantification. *BMC Biol.* **12**, 42 (2014).
- 610 48. Bankevich, A. *et al.* SPAdes: A New Genome Assembly Algorithm and Its Applications to  
611 Single-Cell Sequencing. *J. Comput. Biol.* **19**, 455–477 (2012).
- 612 49. Langmead, B. & Salzberg, S. L. Fast gapped-read alignment with Bowtie 2. *Nat. Methods*  
613 **9**, 357–359 (2012).
- 614 50. Bray, N. L., Pimentel, H., Melsted, P. & Pachter, L. Near-optimal probabilistic RNA-seq  
615 quantification. *Nat. Biotechnol.* **34**, 525–527 (2016).
- 616 51. Buchfink, B., Xie, C. & Huson, D. H. Fast and sensitive protein alignment using DIAMOND.  
617 *Nat. Methods* **12**, 59–60 (2015).
- 618 52. Love, M. I., Huber, W. & Anders, S. Moderated estimation of fold change and dispersion for  
619 RNA-seq data with DESeq2. *Genome Biol.* **15**, 31 (2014).

620 Supplemental Material

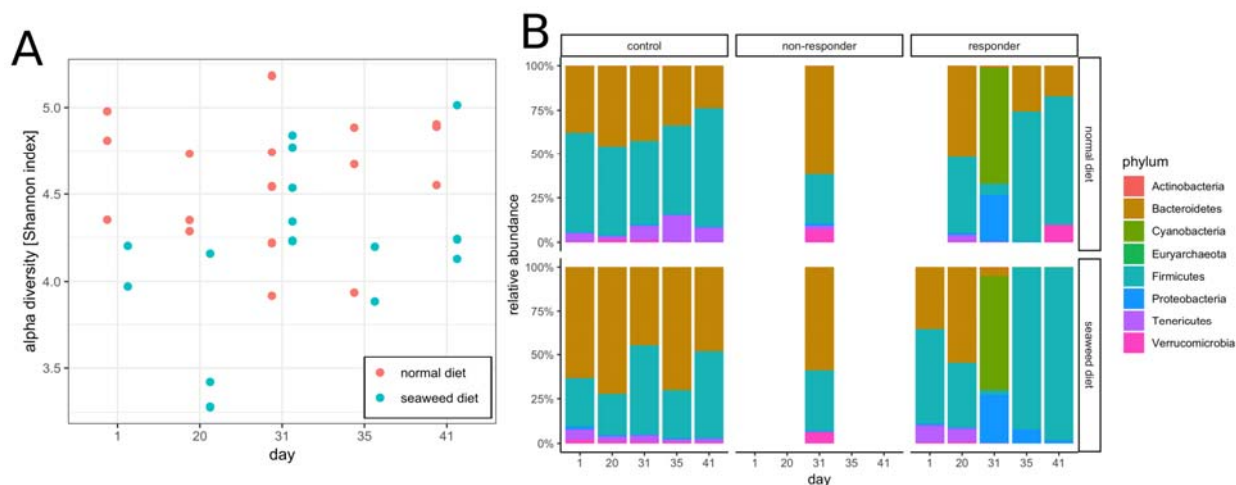

621  
622 **Figure S1. Alpha and beta-diversity trends for the diet study.** (A) There were no significant  
623 differences in alpha diversity (Shannon index) over time between control mice (no antibiotics)  
624 fed a normal diet and mice fed a 1% seaweed diet for 20 days (Wilcoxon rank sum  $p > 0.1$ , for  
625 each day). All rarefied to 10000 reads each. (B) Community composition of control mice was  
626 slightly influenced by seaweed diet (7.7% explained variance, PERMANOVA  $p = 0.01$ ) and this  
627 was mostly due to higher Bacteroidetes/Firmicutes ratio in mice fed the seaweed diet. Susceptible  
628 mice showed little differences before treatment but Bacteroidetes were completely lost in the  
629 seaweed treated susceptible mice (8% explained variance, PERMANOVA  $p = 0.01$ ). Resistant  
630 mice did not show differences based on diet.

631  
632  
633  
634  
635  
636  
637  
638  
639  
640



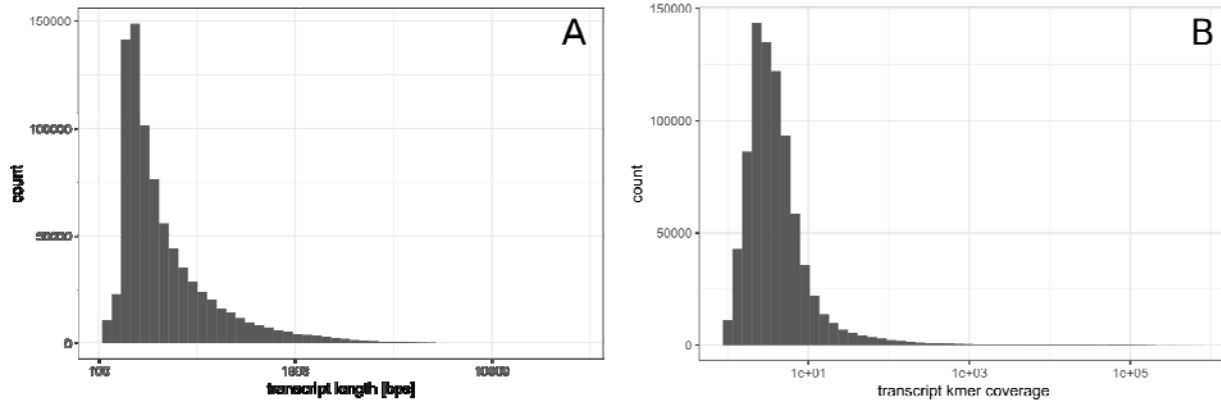

641  
642 **Figure S2. *De novo* assembly summaries for transcripts.** (A) Length distribution of  
643 assembled transcripts. (B) Approximate coverage for assembled transcripts as estimated from  
644 k-mer coverage. Real coverage will always be larger than k-mer coverage.

645  
646  
647  
648  
649  
650  
651  
652  
653  
654  
655  
656  
657  
658  
659  
660  
661  
662  
663

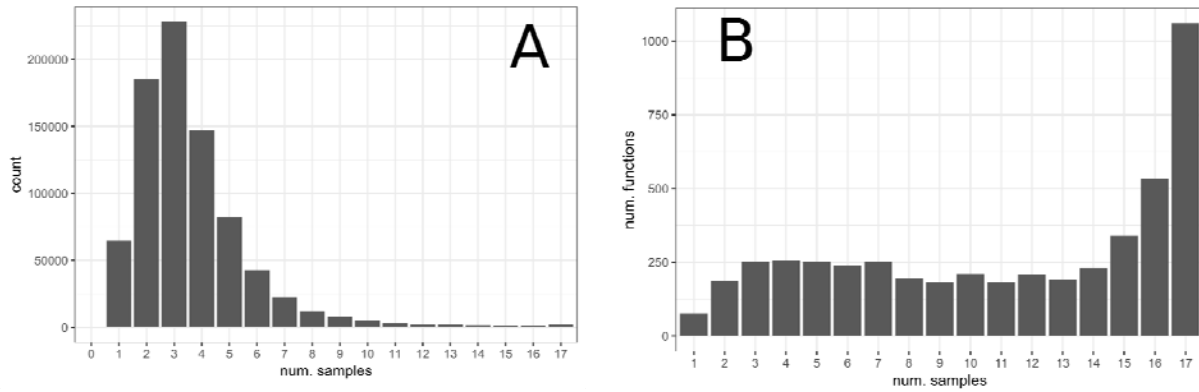

664

665 **Figure S3. Distribution of transcripts and gene functions across RNA-seq samples. (A)**

666 Sample-specificity of assembled transcripts. Each bar denotes the number of transcripts

667 observed in exactly k samples, where k is denoted on the x axis. (B) Sample-specificity of gene

668 functions. Same as in A after collapsing transcripts to unique functional groups (unique IDs from

669 the SEED database).
